# Supplementary material for: Structural and electronic properties of MB22− (M = Na, K) clusters: tubular boron versus quasi-planar boron forms
Source: Royal Society of Chemistry journal article supplement (doi:10.1039/c9nj00661c), 2019-01-01
Supplement: c9nj00661c1.pdf [file c9nj00661c1.pdf]

## Supporting information

### **Structural and electronic properties in $MB_{22}^-$ (M=Na, K) clusters: Tubular boron versus quasi-planar boron forms**

Wei-yan Liang,<sup>a</sup> Anita Das,<sup>b</sup> Xue Dong,<sup>a</sup> Meng-hui Wang,<sup>a</sup> Zhong-hua Cui,<sup>\*a</sup>

*<sup>a</sup>Institute of Atomic and Molecular Physics, Jilin Provincial Key Laboratory of Applied Atomic and Molecular Spectroscopy, Jilin University, Changchun, China*

*<sup>b</sup>Department of Chemistry, Indian Institute of Engineering Science and Technology, Shibpur, Howrah, India*

*Email: zcui@jlu.edu.cn*

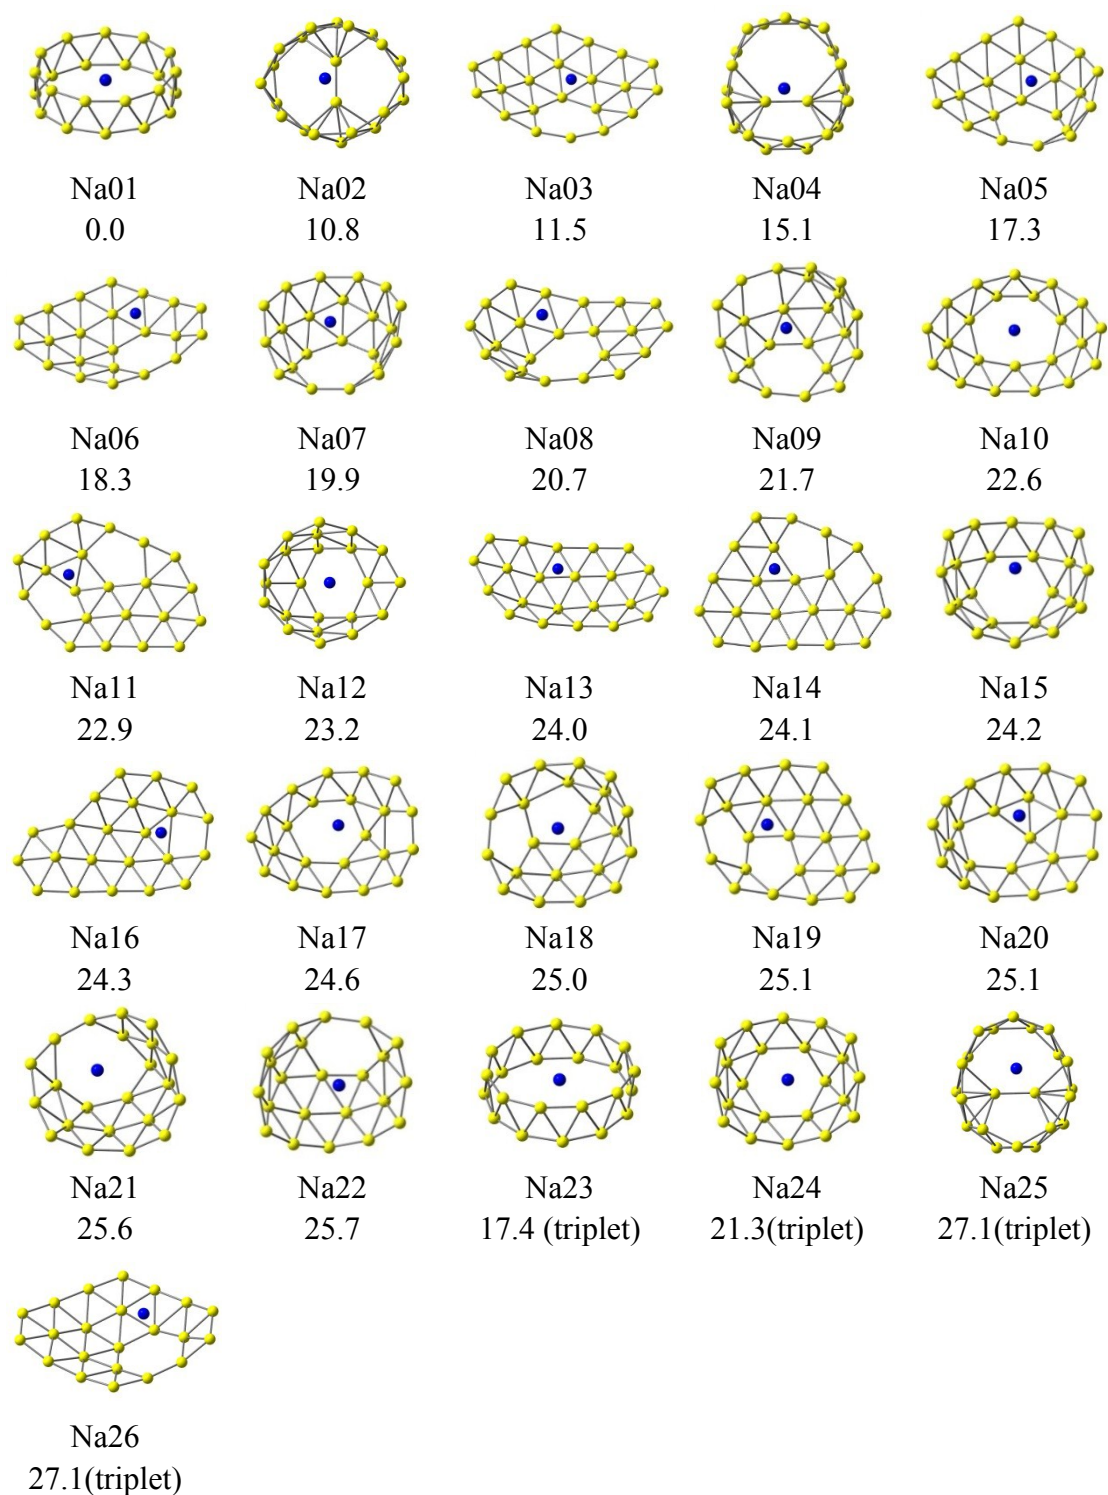

**Figure S1.** Structures and relative energies in kcal/mol of the low-lying isomers of  $\text{NaB}_{22}^-$  obtained at the PBE0/6-311+G(d) level. All isomers are in singlet state unless otherwise indicated. All energies are corrected for zero-point energies (ZPE).

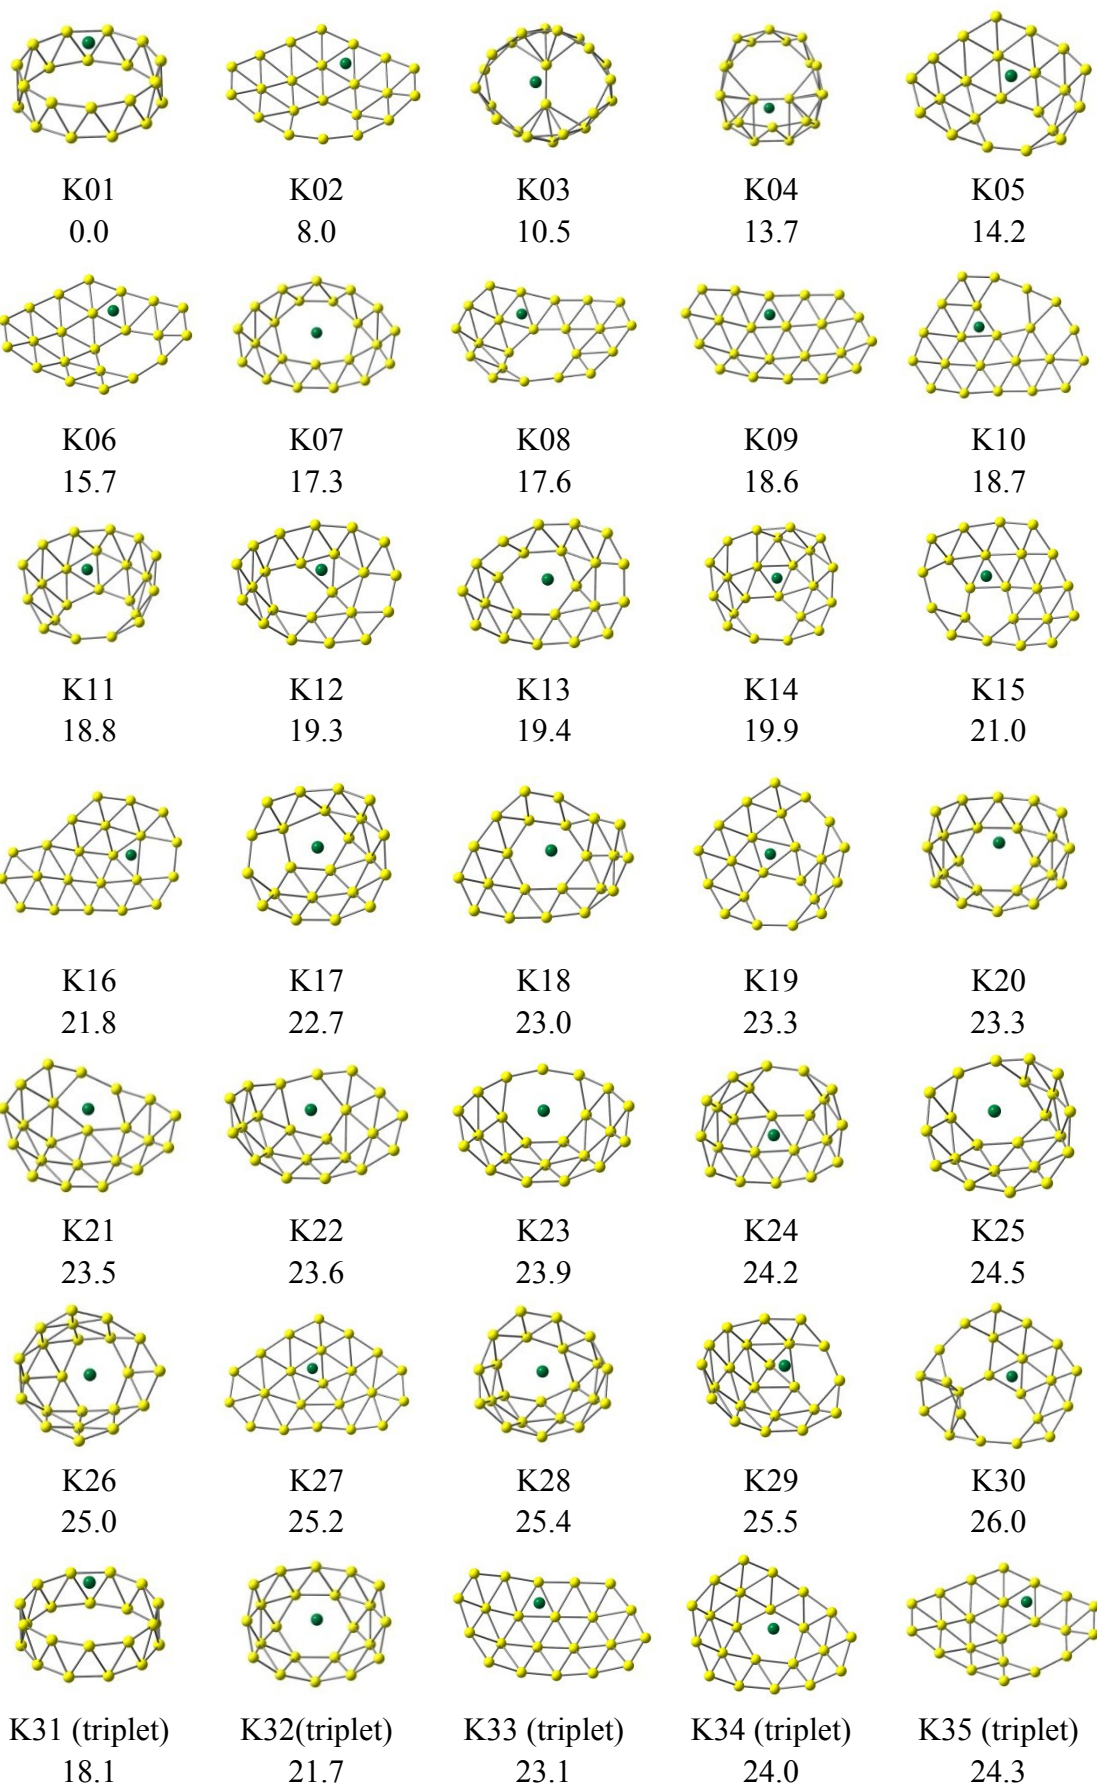

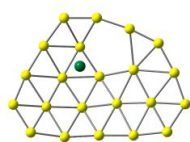

K36 (triplet)  
25.7

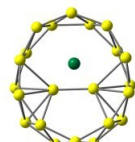

K37 (triplet)  
26.2

**Figure S2.** Structures and relative energies in kcal/mol of the low-lying isomers of KB<sub>22</sub><sup>-</sup> obtained at the PBE0/6-311+G(d) level. All isomers are in singlet state unless otherwise indicated. All energies are corrected for zero-point energies (ZPE).

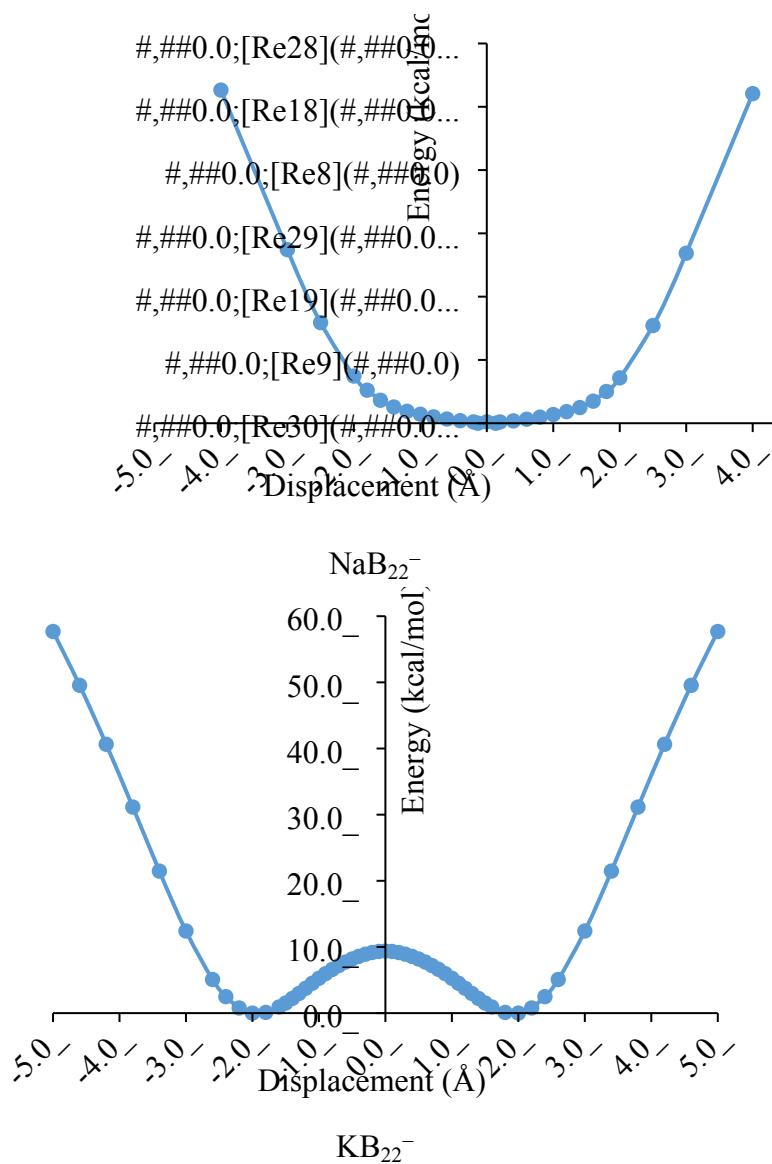

**Figure S3.** Relative energy in kcal/mol as a function of the displacement of M (M=Na, K) along the  $C_{11}$  axis.

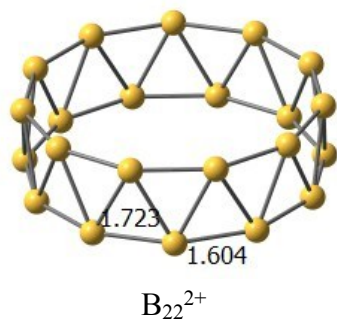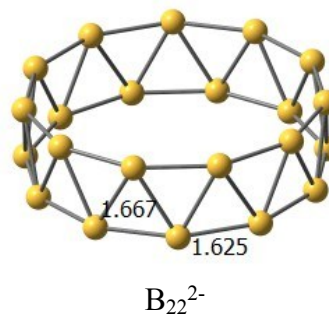

**Figure S4.** Structure and selected bond distances of  $B_{22}^{2+}$  and  $B_{22}^{2-}$  clusters computed at the PBE0/6-311+G(d) level.

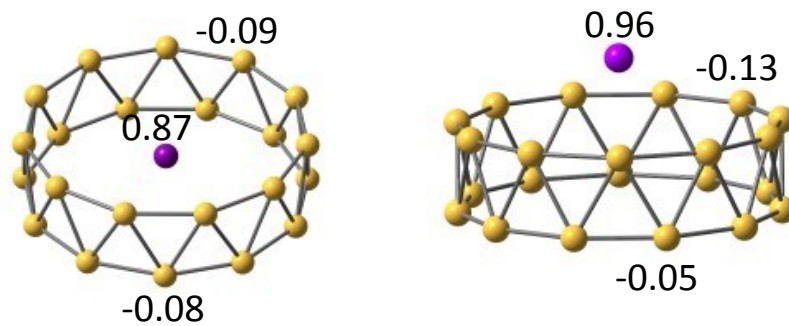

**Figure S5.** NPA charges of  $\text{NaB}_{22}^-$  (left) and  $\text{KB}_{22}^-$  (right) species computed at the PBE0/6-311+G(d) level.

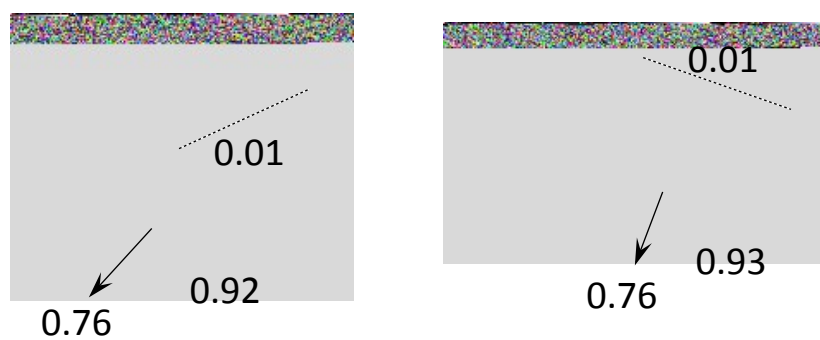

**Figure S6.** Wiberg bond index values of  $\text{NaB}_{22}^-$  (left) and  $\text{KB}_{22}^-$  (right) species computed at the PBE0/6-311+G(d) level.



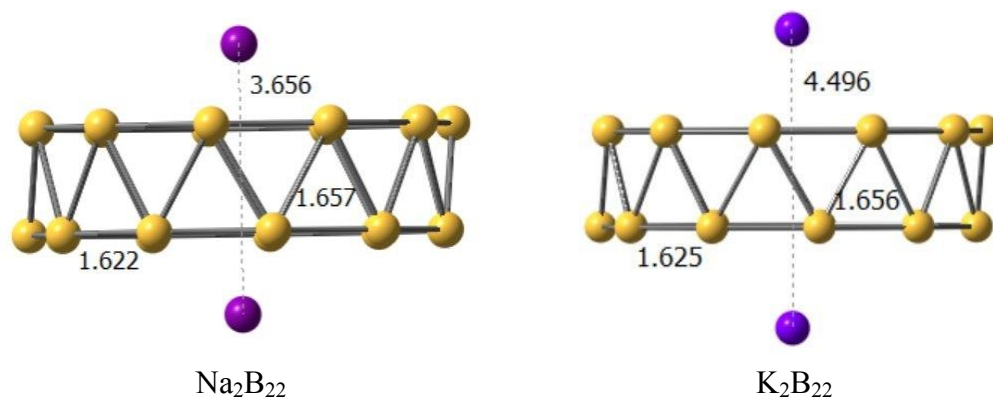

**Figure S7.** Structure and selected bond distances of  $\text{Na}_2\text{B}_{22}$  and  $\text{K}_2\text{B}_{22}$  clusters computed at the PBE0/6-311+G(d) level.

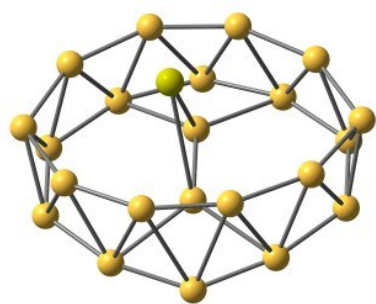

0.0 kcal/mol

Mg01

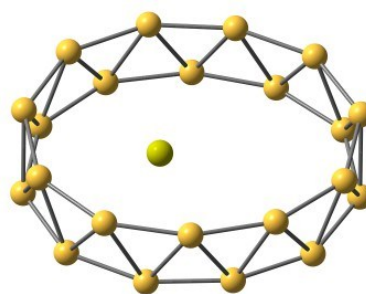

12.2 kcal/mol

Mg02

MgB<sub>22</sub>

**Figure S8.** The structures and relative energy of MgB<sub>22</sub> at the PBE0/6-311+G(d) level.

**Table S1.** Coordinates of tubular structuresNaB<sub>22</sub><sup>-</sup>

|    |              |              |              |
|----|--------------|--------------|--------------|
| B  | 1.890173000  | -2.181376000 | -0.711900000 |
| B  | 2.886686000  | 0.000000000  | 0.735038000  |
| B  | -2.886374000 | 0.000000000  | -0.711900000 |
| B  | -1.890377000 | 2.181611000  | 0.735038000  |
| B  | 2.428434000  | -1.560660000 | 0.735038000  |
| B  | 2.769456000  | -0.813186000 | -0.711900000 |
| B  | -2.769755000 | 0.813273000  | 0.735038000  |
| B  | -2.428172000 | 1.560492000  | -0.711900000 |
| B  | -1.199043000 | -2.625538000 | -0.711900000 |
| B  | 1.199173000  | 2.625822000  | 0.735038000  |
| B  | 0.410774000  | -2.856995000 | -0.711900000 |
| B  | 2.428434000  | 1.560660000  | 0.735038000  |
| B  | -2.428172000 | -1.560492000 | -0.711900000 |
| B  | -0.410818000 | 2.857303000  | 0.735038000  |
| B  | 1.890173000  | 2.181376000  | -0.711900000 |
| B  | -0.410818000 | -2.857303000 | 0.735038000  |
| B  | 0.410774000  | 2.856995000  | -0.711900000 |
| B  | -1.890377000 | -2.181611000 | 0.735038000  |
| B  | 2.769456000  | 0.813186000  | -0.711900000 |
| B  | 1.199173000  | -2.625822000 | 0.735038000  |
| B  | -1.199043000 | 2.625538000  | -0.711900000 |
| B  | -2.769755000 | -0.813273000 | 0.735038000  |
| Na | 0.000000000  | 0.000000000  | -0.121880000 |

KB<sub>22</sub><sup>-</sup>

|   |              |              |              |
|---|--------------|--------------|--------------|
| B | -2.767904000 | 0.812730000  | -0.453474000 |
| B | -1.889114000 | 2.180154000  | -0.453474000 |
| B | -0.410544000 | 2.855394000  | -0.453474000 |
| B | 1.198371000  | 2.624067000  | -0.453474000 |
| B | 2.426812000  | 1.559617000  | -0.453474000 |
| B | 2.884757000  | 0.000000000  | -0.453474000 |
| B | 2.426812000  | -1.559617000 | -0.453474000 |
| B | 1.198371000  | -2.624067000 | -0.453474000 |
| B | -0.410544000 | -2.855394000 | -0.453474000 |
| B | -1.889114000 | -2.180154000 | -0.453474000 |
| B | -2.767904000 | -0.812730000 | -0.453474000 |
| B | -2.888285000 | 0.000000000  | 0.989918000  |
| B | -2.429780000 | -1.561525000 | 0.989918000  |
| B | -1.199837000 | -2.627276000 | 0.989918000  |

|   |              |              |              |
|---|--------------|--------------|--------------|
| B | 0.411046000  | -2.858886000 | 0.989918000  |
| B | 1.891424000  | -2.182820000 | 0.989918000  |
| B | 2.771289000  | -0.813724000 | 0.989918000  |
| B | 2.771289000  | 0.813724000  | 0.989918000  |
| B | 1.891424000  | 2.182820000  | 0.989918000  |
| B | 0.411046000  | 2.858886000  | 0.989918000  |
| B | -1.199837000 | 2.627276000  | 0.989918000  |
| B | -2.429780000 | 1.561525000  | 0.989918000  |
| K | 0.000000000  | 0.000000000  | -1.667313000 |
